# Supplementary material for: Detection of Spatial and Temporal Patterns of Liana Infestation Using Satellite-Derived Imagery
Source: MDPI journal article supplement (doi:10.3390/rs13142774), 2021-07-14
Supplement: s1 [file s1]

# Supplementary Materials: Detection of spatial and temporal patterns of liana infestation using satellite-derived imagery

Chris J. Chandler, Geertje M.F. van der Heijden, Doreen S. Boyd and Giles M. Foody

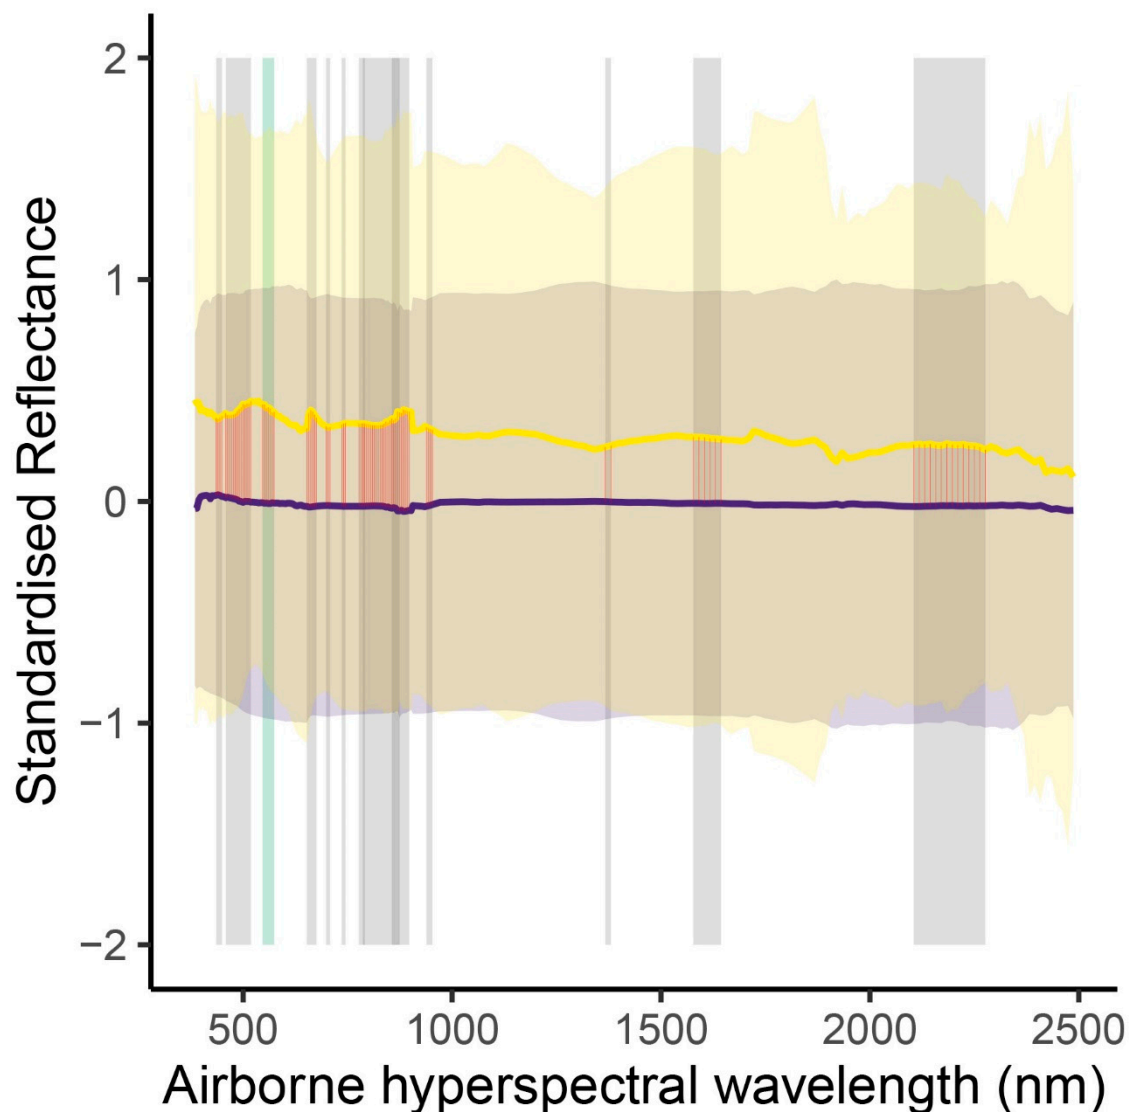

**Figure S1.** Airborne-derived standardised ( $\mu = 0$ ,  $\sigma = 1$ ) hyperspectral reflectance of liana-free trees and trees severely infested with liana leaves. Lines are mean reflectance values for all trees (shading  $\pm 1$  SD). Blue lines represent liana-free trees ( $n_{\text{trees}} = 226$ ,  $n_{\text{pixels}} = 7826$ ), yellow lines represent trees highly infested with liana leaves ( $n_{\text{trees}} = 41$ ,  $n_{\text{pixels}} = 1001$ ). Grey vertical bars represent the position of Sentinel-2 bands. Red vertical lines correspond to airborne hyperspectral bands that are within Sentinel-2 bands. The green vertical bar indicates the green region of the spectra that shows the greatest difference between liana-free and liana-infested trees.

**Table S1.** Comparison of vegetation indices for the separation of low ( $\leq 25\%$ ) and severe ( $\geq 75\%$ ) liana infestation classes within the primary and logged forests and across the full landscape for each of the four satellite-derived images (2016-2019). Values correspond to Cliff's *delta* effect sizes. Overall average corresponds to the average of the 4-year average for all locations. .

| Year           | Metric           | All           | Primary       | Logged        | Overall Average |
|----------------|------------------|---------------|---------------|---------------|-----------------|
| 2016           | Green            | 0.43          | 0.32          | 0.09          |                 |
| 2017           | Green            | 0.27          | 0.14          | 0.1           |                 |
| 2018           | Green            | 0.2           | 0.11          | 0.27          |                 |
| 2019           | Green            | 0.07          | 0.15          | 0.08          |                 |
| <b>Average</b> | <b>Green</b>     | <b>0.2425</b> | <b>0.18</b>   | <b>0.135</b>  | <b>0.185833</b> |
| 2016           | Greenness        | 0.39          | 0.41          | 0.27          |                 |
| 2017           | Greenness        | 0.32          | 0.26          | 0.4           |                 |
| 2018           | Greenness        | 0.22          | 0.15          | 0.32          |                 |
| 2019           | Greenness        | 0.3           | 0.22          | 0.3           |                 |
| <b>Average</b> | <b>Greenness</b> | <b>0.3075</b> | <b>0.26</b>   | <b>0.3225</b> | <b>0.296667</b> |
| 2016           | CLG              | 0.05          | 0.13          | 0.02          |                 |
| 2017           | CLG              | 0.07          | 0.07          | 0.17          |                 |
| 2018           | CLG              | 0.09          | 0.03          | 0.08          |                 |
| 2019           | CLG              | 0.34          | 0.33          | 0.27          |                 |
| <b>Average</b> | <b>CLG</b>       | <b>0.1375</b> | <b>0.14</b>   | <b>0.135</b>  | <b>0.1375</b>   |
| 2016           | CLRE             | 0.13          | 0.08          | 0.03          |                 |
| 2017           | CLRE             | 0.21          | 0.1           | 0.13          |                 |
| 2018           | CLRE             | 0.05          | 0.03          | 0.13          |                 |
| 2019           | CLRE             | 0.22          | 0.28          | 0.23          |                 |
| <b>Average</b> | <b>CLRE</b>      | <b>0.1525</b> | <b>0.1225</b> | <b>0.13</b>   | <b>0.135</b>    |
| 2016           | CTVI             | 0.23          | 0.37          | 0.21          |                 |
| 2017           | CTVI             | 0.12          | 0.12          | 0.37          |                 |
| 2018           | CTVI             | 0.21          | 0.16          | 0.3           |                 |
| 2019           | CTVI             | 0.39          | 0.36          | 0.37          |                 |
| <b>Average</b> | <b>CTVI</b>      | <b>0.2375</b> | <b>0.2525</b> | <b>0.3125</b> | <b>0.2675</b>   |
| 2016           | EVI              | 0.37          | 0.39          | 0.15          |                 |
| 2017           | EVI              | 0.17          | 0.09          | 0.25          |                 |
| 2018           | EVI              | 0.22          | 0.14          | 0.31          |                 |
| 2019           | EVI              | 0.23          | 0.14          | 0.31          |                 |
| <b>Average</b> | <b>EVI</b>       | <b>0.2475</b> | <b>0.19</b>   | <b>0.255</b>  | <b>0.230833</b> |
| 2016           | GEMI             | 0.36          | 0.36          | 0.15          |                 |
| 2017           | GEMI             | 0.16          | 0.08          | 0.26          |                 |
| 2018           | GEMI             | 0.21          | 0.13          | 0.31          |                 |
| 2019           | GEMI             | 0.18          | 0.1           | 0.28          |                 |
| <b>Average</b> | <b>GEMI</b>      | <b>0.2275</b> | <b>0.1675</b> | <b>0.25</b>   | <b>0.215</b>    |
| 2016           | GNDVI            | 0.21          | 0.3           | 0.14          |                 |
| 2017           | GNDVI            | 0.04          | 0.01          | 0.27          |                 |
| 2018           | GNDVI            | 0.18          | 0.11          | 0.26          |                 |
| 2019           | GNDVI            | 0.25          | 0.21          | 0.3           |                 |
| <b>Average</b> | <b>GNDVI</b>     | <b>0.17</b>   | <b>0.1575</b> | <b>0.2425</b> | <b>0.19</b>     |
| 2016           | MNDWI            | 0.08          | 0.1           | 0.02          |                 |
| 2017           | MNDWI            | 0.19          | 0.2           | 0.06          |                 |
| 2018           | MNDWI            | 0.24          | 0.25          | 0.04          |                 |
| 2019           | MNDWI            | 0.49          | 0.52          | 0.25          |                 |
| <b>Average</b> | <b>MNDWI</b>     | <b>0.25</b>   | <b>0.2675</b> | <b>0.0925</b> | <b>0.203333</b> |
| 2016           | MSAVI            | 0.32          | 0.37          | 0.18          |                 |
| 2017           | MSAVI            | 0.15          | 0.09          | 0.3           |                 |
| 2018           | MSAVI            | 0.22          | 0.14          | 0.32          |                 |
| 2019           | MSAVI            | 0.27          | 0.21          | 0.33          |                 |
| <b>Average</b> | <b>MSAVI</b>     | <b>0.24</b>   | <b>0.2025</b> | <b>0.2825</b> | <b>0.241667</b> |
| 2016           | MSAVI2           | 0.35          | 0.37          | 0.16          |                 |
| 2017           | MSAVI2           | 0.16          | 0.09          | 0.28          |                 |

|                |               |               |               |               |                 |
|----------------|---------------|---------------|---------------|---------------|-----------------|
| 2018           | MSAVI2        | 0.22          | 0.13          | 0.31          |                 |
| 2019           | MSAVI2        | 0.22          | 0.15          | 0.3           |                 |
| <b>Average</b> | <b>MSAVI2</b> | <b>0.2375</b> | <b>0.185</b>  | <b>0.2625</b> | <b>0.228333</b> |
| 2016           | MTCI          | 0.31          | 0.18          | 0.13          |                 |
| 2017           | MTCI          | 0.42          | 0.32          | 0.2           |                 |
| 2018           | MTCI          | 0.17          | 0.03          | 0.06          |                 |
| 2019           | MTCI          | 0.22          | 0.14          | 0.07          |                 |
| <b>Average</b> | <b>MTCI</b>   | <b>0.28</b>   | <b>0.1675</b> | <b>0.115</b>  | <b>0.1875</b>   |
| 2016           | NBRI          | 0.04          | 0.12          | 0.12          |                 |
| 2017           | NBRI          | 0.14          | 0.21          | 0.25          |                 |
| 2018           | NBRI          | 0.11          | 0.18          | 0.19          |                 |
| 2019           | NBRI          | 0.18          | 0.25          | 0.03          |                 |
| <b>Average</b> | <b>NBRI</b>   | <b>0.1175</b> | <b>0.19</b>   | <b>0.1475</b> | <b>0.151667</b> |
| 2016           | NDREI         | 0.08          | 0.13          | 0.01          |                 |
| 2017           | NDREI         | 0.13          | 0.02          | 0.19          |                 |
| 2018           | NDREI         | 0.02          | 0.07          | 0.16          |                 |
| 2019           | NDREI         | 0.24          | 0.31          | 0.24          |                 |
| <b>Average</b> | <b>NDREI</b>  | <b>0.1175</b> | <b>0.1325</b> | <b>0.15</b>   | <b>0.133333</b> |
| 2016           | NDREI2        | 0.13          | 0.08          | 0.03          |                 |
| 2017           | NDREI2        | 0.21          | 0.1           | 0.13          |                 |
| 2018           | NDREI2        | 0.05          | 0.03          | 0.13          |                 |
| 2019           | NDREI2        | 0.22          | 0.28          | 0.23          |                 |
| <b>Average</b> | <b>NDREI2</b> | <b>0.1525</b> | <b>0.1225</b> | <b>0.13</b>   | <b>0.135</b>    |
| 2016           | NDVI          | 0.23          | 0.37          | 0.21          |                 |
| 2017           | NDVI          | 0.12          | 0.12          | 0.37          |                 |
| 2018           | NDVI          | 0.21          | 0.16          | 0.3           |                 |
| 2019           | NDVI          | 0.39          | 0.36          | 0.37          |                 |
| <b>Average</b> | <b>NDVI</b>   | <b>0.2375</b> | <b>0.2525</b> | <b>0.3125</b> | <b>0.2675</b>   |
| 2016           | NDWI          | 0.21          | 0.3           | 0.14          |                 |
| 2017           | NDWI          | 0.04          | 0.01          | 0.27          |                 |
| 2018           | NDWI          | 0.18          | 0.11          | 0.26          |                 |
| 2019           | NDWI          | 0.25          | 0.21          | 0.3           |                 |
| <b>Average</b> | <b>NDWI</b>   | <b>0.17</b>   | <b>0.1575</b> | <b>0.2425</b> | <b>0.19</b>     |
| 2016           | NDWI2         | 0.13          | 0.2           | 0.14          |                 |
| 2017           | NDWI2         | 0.11          | 0.16          | 0.21          |                 |
| 2018           | NDWI2         | 0.05          | 0.1           | 0.24          |                 |
| 2019           | NDWI2         | 0.21          | 0.26          | 0.06          |                 |
| <b>Average</b> | <b>NDWI2</b>  | <b>0.125</b>  | <b>0.18</b>   | <b>0.1625</b> | <b>0.155833</b> |
| 2016           | NRVI          | 0.23          | 0.37          | 0.21          |                 |
| 2017           | NRVI          | 0.12          | 0.12          | 0.37          |                 |
| 2018           | NRVI          | 0.21          | 0.16          | 0.3           |                 |
| 2019           | NRVI          | 0.39          | 0.36          | 0.37          |                 |
| <b>Average</b> | <b>NRVI</b>   | <b>0.2375</b> | <b>0.2525</b> | <b>0.3125</b> | <b>0.2675</b>   |
| 2016           | REIP          | 0.02          | 0.21          | 0.07          |                 |
| 2017           | REIP          | 0.04          | 0.11          | 0.24          |                 |
| 2018           | REIP          | 0.05          | 0.11          | 0.12          |                 |
| 2019           | REIP          | 0.27          | 0.32          | 0.21          |                 |
| <b>Average</b> | <b>REIP</b>   | <b>0.095</b>  | <b>0.1875</b> | <b>0.16</b>   | <b>0.1475</b>   |
| 2016           | RVI           | 0.23          | 0.37          | 0.21          |                 |
| 2017           | RVI           | 0.12          | 0.12          | 0.37          |                 |
| 2018           | RVI           | 0.21          | 0.16          | 0.3           |                 |
| 2019           | RVI           | 0.39          | 0.36          | 0.37          |                 |
| <b>Average</b> | <b>RVI</b>    | <b>0.2375</b> | <b>0.2525</b> | <b>0.3125</b> | <b>0.2675</b>   |
| 2016           | SLAVI         | 0.17          | 0.26          | 0.17          |                 |
| 2017           | SLAVI         | 0.05          | 0.08          | 0.28          |                 |
| 2018           | SLAVI         | 0.007         | 0.05          | 0.26          |                 |
| 2019           | SLAVI         | 0.02          | 0.07          | 0.16          |                 |

| Average | SLAVI | 0.06175 | 0.115  | 0.2175 | 0.131417 |
|---------|-------|---------|--------|--------|----------|
| 2016    | SR    | 0.23    | 0.37   | 0.21   |          |
| 2017    | SR    | 0.12    | 0.12   | 0.37   |          |
| 2018    | SR    | 0.21    | 0.16   | 0.3    |          |
| 2019    | SR    | 0.39    | 0.36   | 0.37   |          |
| Average | SR    | 0.2375  | 0.2525 | 0.3125 | 0.2675   |
| 2016    | TTVI  | 0.23    | 0.37   | 0.21   |          |
| 2017    | TTVI  | 0.12    | 0.12   | 0.37   |          |
| 2018    | TTVI  | 0.21    | 0.16   | 0.3    |          |
| 2019    | TTVI  | 0.39    | 0.36   | 0.37   |          |
| Average | TTVI  | 0.2375  | 0.2525 | 0.3125 | 0.2675   |
| 2016    | TVI   | 0.23    | 0.37   | 0.21   |          |
| 2017    | TVI   | 0.12    | 0.12   | 0.37   |          |
| 2018    | TVI   | 0.21    | 0.16   | 0.3    |          |
| 2019    | TVI   | 0.39    | 0.36   | 0.37   |          |
| Average | TVI   | 0.2375  | 0.2525 | 0.3125 | 0.2675   |

**Green**, Green reflectance; **Greenness**, Greenness Index; **CLG**, Green-band Chlorophyll Index; **CLRE**, Red-edge-band Chlorophyll Index; **CTVI**, Corrected transformed vegetation index; **EVI**, Enhanced vegetation index; **GEMI**, Global environmental monitoring index; **GNDVI**, Green normalised difference vegetation index; **MNDWI**, modified normalised difference water index; **MSAVI**, modified soil adjusted vegetation index; **MSAVI2**, modified soil adjusted vegetation index 2; **MTCI**, MERIS terrestrial chlorophyll index; **NBRI**, normalised burn ratio index; **NDREI1**, normalised difference red edge index1; **NDREI2**, normalised difference red edge index2; **NDVI**, normalised difference vegetation index; **NDWI**, normalised difference water index; **NDWI2**, normalised difference water index2; **NRVI**, normalised ration vegetation index; **REIP**, red edge inflection point; **RVI**, ratio vegetation index; **SLAVI**, specific leaf area vegetation index; **SR**, simple ratio vegetation index; **TTVI**, Thiam's transformed vegetation index; **TVI**, transformed vegetation index.

**Table S2.** Accuracy assessment for predicted liana infestation in satellite-based multispectral imagery using three different sets of input variables: 1) all Sentinel 2-bands, 2) Greenness Index 3) all Sentinel 2-bands and Greenness Index within the primary and selectively logged forests. 95%CI, 95% confidence intervals for accuracy; Bal. Acc., Balanced Accuracy =  $(sensitivity + specificity)/2$ ; F<sub>1</sub>, F<sub>1</sub> score or F-measure; AUC, Area under the curve.

| Class                                                | Accuracy | 95% CI      | Sensitivity | Specificity | Bal. Acc | F1   | AUC  |
|------------------------------------------------------|----------|-------------|-------------|-------------|----------|------|------|
| <b>1) All Sentinel-2 bands</b>                       |          |             |             |             |          |      |      |
| <i>Primary</i>                                       |          |             |             |             |          |      |      |
| <b>2 classes: [0-25], [75-100]</b>                   |          |             |             |             |          |      |      |
|                                                      | 0.99     | 0.976-1     | 1           | 0.97        | 0.98     | 0.99 | 0.98 |
| <b>4 Classes: [0-25], [25-50], [50-75], [75-100]</b> |          |             |             |             |          |      |      |
|                                                      | 0.45     | 0.44-0.462  |             |             |          |      | 0.76 |
| Class: L                                             |          |             | 0.56        | 0.78        | 0.67     | 0.3  |      |
| Class: M                                             |          |             | 0.55        | 0.53        | 0.54     | 0.54 |      |
| Class: H                                             |          |             | 0.32        | 0.87        | 0.6      | 0.42 |      |
| Class: S                                             |          |             | 0.24        | 0.98        | 0.61     | 0.32 |      |
| <i>Secondary</i>                                     |          |             |             |             |          |      |      |
| <b>2 classes: [0-25], [75-100]</b>                   |          |             |             |             |          |      |      |
|                                                      | 0.84     | 0.802-0.875 | 1           | 0.82        | 0.91     | 0.61 | 0.91 |
| <b>4 Classes: [0-25], [25-50], [50-75], [75-100]</b> |          |             |             |             |          |      |      |
|                                                      | 0.35     | 0.34-0.361  |             |             |          |      | 0.7  |
| Class: L                                             |          |             | 0.38        | 0.86        | 0.62     | 0.08 |      |
| Class: M                                             |          |             | 0.59        | 0.51        | 0.55     | 0.41 |      |
| Class: H                                             |          |             | 0.28        | 0.75        | 0.51     | 0.37 |      |

|                                                      |             |       |       |      |      |      |
|------------------------------------------------------|-------------|-------|-------|------|------|------|
| Class: S                                             | 0.2         | 0.96  | 0.58  | 0.29 |      |      |
| <b>2) Greenness Index</b>                            |             |       |       |      |      |      |
| <i>Primary</i>                                       |             |       |       |      |      |      |
| <b>2 classes: [0-25], [75-100]</b>                   |             |       |       |      |      |      |
| 0.86                                                 | 0.798-0.908 | 0.97  | 0.69  | 0.83 | 0.89 | 0.83 |
| <b>4 Classes: [0-25], [25-50], [50-75], [75-100]</b> |             |       |       |      |      |      |
| 0.45                                                 | 0.442-0.464 |       |       |      |      | 0.61 |
| Class: L                                             |             | 0.14  | 0.89  | 0.52 | 0.13 |      |
| Class: M                                             |             | 0.73  | 0.32  | 0.52 | 0.6  |      |
| Class: H                                             |             | 0.21  | 0.85  | 0.53 | 0.29 |      |
| Class: S                                             |             | 0.1   | 0.99  | 0.55 | 0.16 |      |
| <i>Secondary</i>                                     |             |       |       |      |      |      |
| <b>2 classes: [0-25], [75-100]</b>                   |             |       |       |      |      |      |
| 0.25                                                 | 0.03-0.65   | 0     | 0.33  | 0.17 | 0    | 0    |
| <b>4 Classes: [0-25], [25-50], [50-75], [75-100]</b> |             |       |       |      |      |      |
| 0.39                                                 | 0.38-0.401  |       |       |      |      | 0.59 |
| Class: L                                             |             | 0     | 1     | 0.5  | 0    |      |
| Class: M                                             |             | 0.68  | 0.43  | 0.55 | 0.41 |      |
| Class: H                                             |             | 0.4   | 0.6   | 0.5  | 0.46 |      |
| Class: S                                             |             | 0     | 1     | 0.5  | 0    |      |
| <b>3) All Sentinel-2 bands + Greenness Index</b>     |             |       |       |      |      |      |
| <i>Primary</i>                                       |             |       |       |      |      |      |
| <b>2 classes: [0-25], [75-100]</b>                   |             |       |       |      |      |      |
| 0.99                                                 | 0.978-0.996 | 1     | 0.98  | 0.99 | 0.99 | 0.99 |
| <b>4 Classes: [0-25], [25-50], [50-75], [75-100]</b> |             |       |       |      |      |      |
| 0.48                                                 | 0.473-0.495 |       |       |      |      | 0.8  |
| Class: L                                             |             | 0.61  | 0.79  | 0.7  | 0.32 |      |
| Class: M                                             |             | 0.51  | 0.64  | 0.58 | 0.54 |      |
| Class: H                                             |             | 0.43  | 0.84  | 0.64 | 0.5  |      |
| Class: S                                             |             | 0.39  | 0.96  | 0.68 | 0.4  |      |
| <i>Secondary</i>                                     |             |       |       |      |      |      |
| <b>2 classes: [0-25], [75-100]</b>                   |             |       |       |      |      |      |
| 0.88                                                 | 0.849-0.914 | 0.947 | 0.874 | 0.91 | 0.7  | 0.91 |
| <b>4 Classes: [0-25], [25-50], [50-75], [75-100]</b> |             |       |       |      |      |      |
| 0.37                                                 | 0.359-0.38  |       |       |      |      | 0.71 |
| Class: L                                             |             | 0.36  | 0.86  | 0.61 | 0.08 |      |
| Class: M                                             |             | 0.58  | 0.52  | 0.55 | 0.41 |      |
| Class: H                                             |             | 0.32  | 0.75  | 0.53 | 0.41 |      |
| Class: S                                             |             | 0.21  | 0.97  | 0.59 | 0.3  |      |

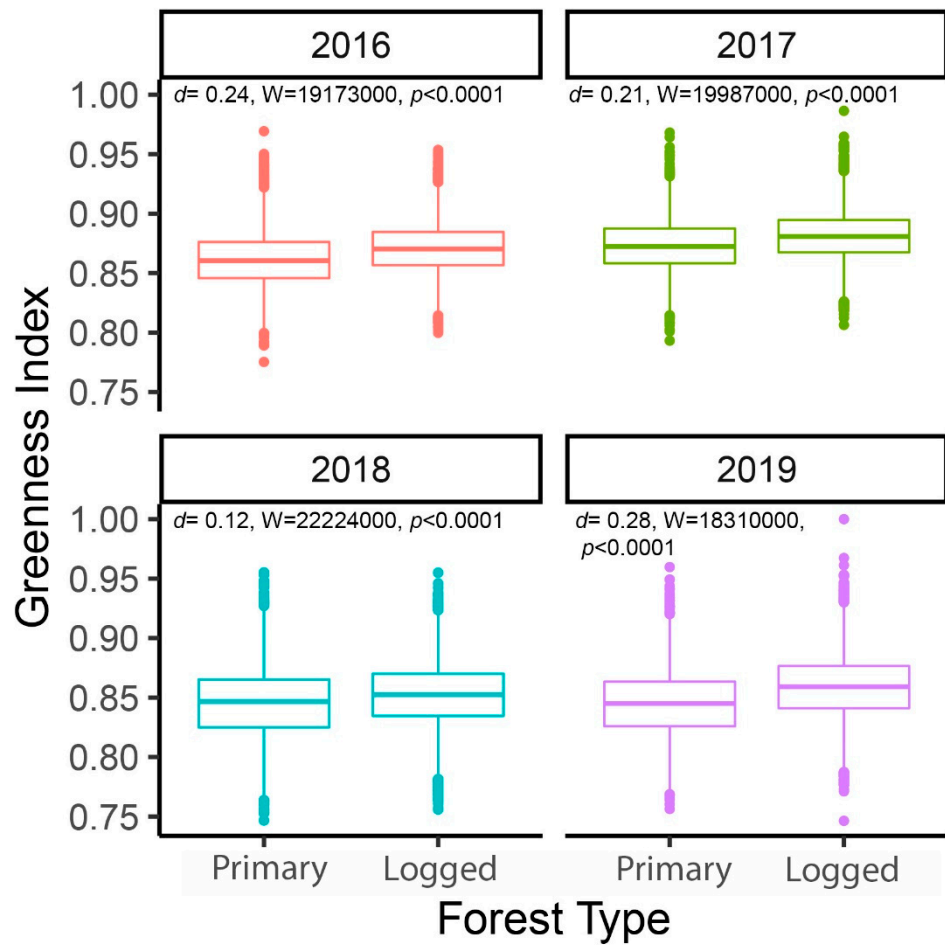

**Figure S2.** Difference in greenness between the primary and logged forest for imagery collected from 2016 to 2019. Statistically significant differences in greenness values between primary and logged forests are indicated with Cliff's delta ( $d$ ), as a measure of effect size, and a 2 sample Wilcoxon test.
